# Supplementary material
Source: PubMed Central journal article supplement (PMC7018553)
Supplement: NIHMS1061540-supplement-Supp_figS1-2.pdf [file NIHMS1061540-supplement-Supp_figS1-2.pdf]

Supplemental Figure 1

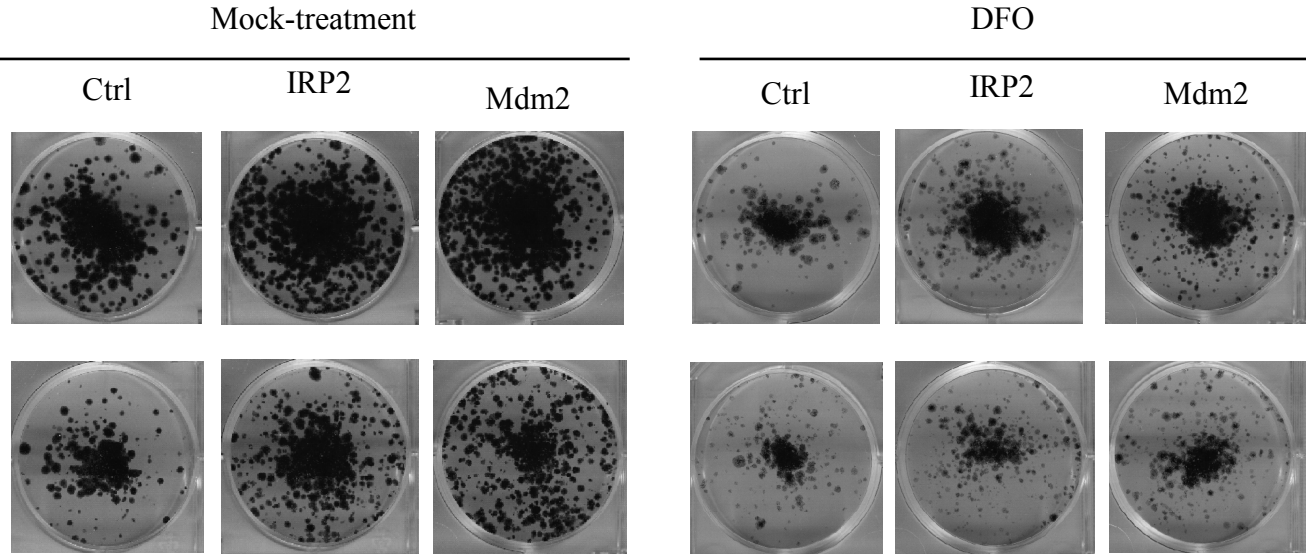

**Supplemental Figure 1** Isogenic control and IRP2-KO p53<sup>-/-</sup> HCT116 cells were transiently transfected with a control vector or a vector expressing IRP2 or Mdm2 for 24 hours, followed by colony formation with or without treatment of DFO (100  $\mu$ M, 24 hours).

Supplemental Figure 2

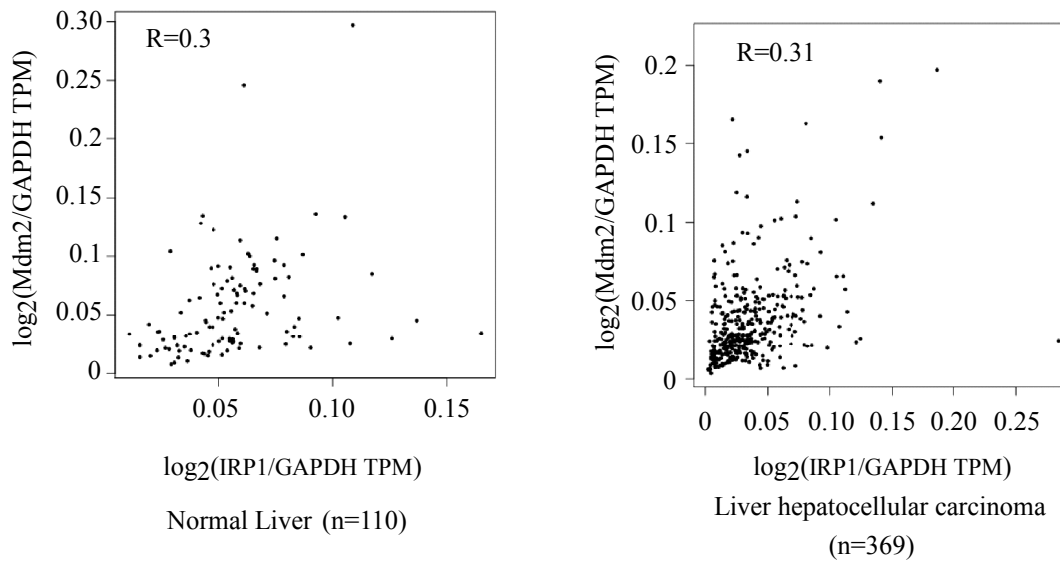

**Supplemental Figure 2** Statistical analysis suggests a modest correlation between IRP1 and Mdm2 expression in normal liver tissues (Pearson's  $r=0.3$ ) and cancerous liver tissues (Pearson's  $r=0.31$ ). The analysis was performed using the GEPIA2 database (<http://gepia2.cancer-pku.cn/#correlation>).
